# Supplementary material for: Transcriptomic analysis reveals vacuolar Na+ (K+)/H+ antiporter gene contributing to growth, development, and defense in switchgrass (Panicum virgatum L.)
Source: PubMed Central journal article supplement (PMC5892015; doi:10.1186/s12870-018-1278-5), 2018-04-10
Supplement: 12870_2018_1278_MOESM2_ESM.pdf [file 12870_2018_1278_MOESM2_ESM.pdf]

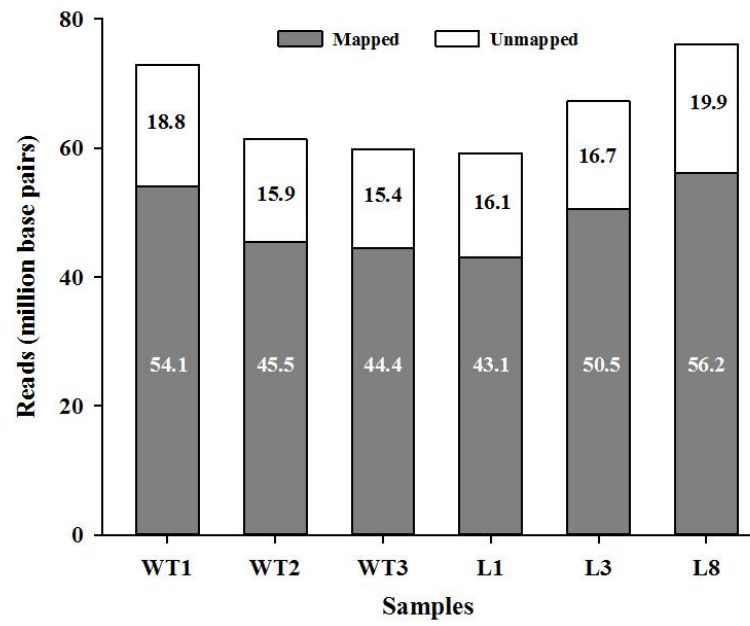

**Figure S1.** Total mapped and unmapped RNA-seq clean reads for transgenic lines and WT plants.
