# Supplementary material for: Transcriptomic analysis reveals vacuolar Na+ (K+)/H+ antiporter gene contributing to growth, development, and defense in switchgrass (Panicum virgatum L.)
Source: PubMed Central journal article supplement (PMC5892015; doi:10.1186/s12870-018-1278-5), 2018-04-10
Supplement: 12870_2018_1278_MOESM6_ESM.pdf [file 12870_2018_1278_MOESM6_ESM.pdf]

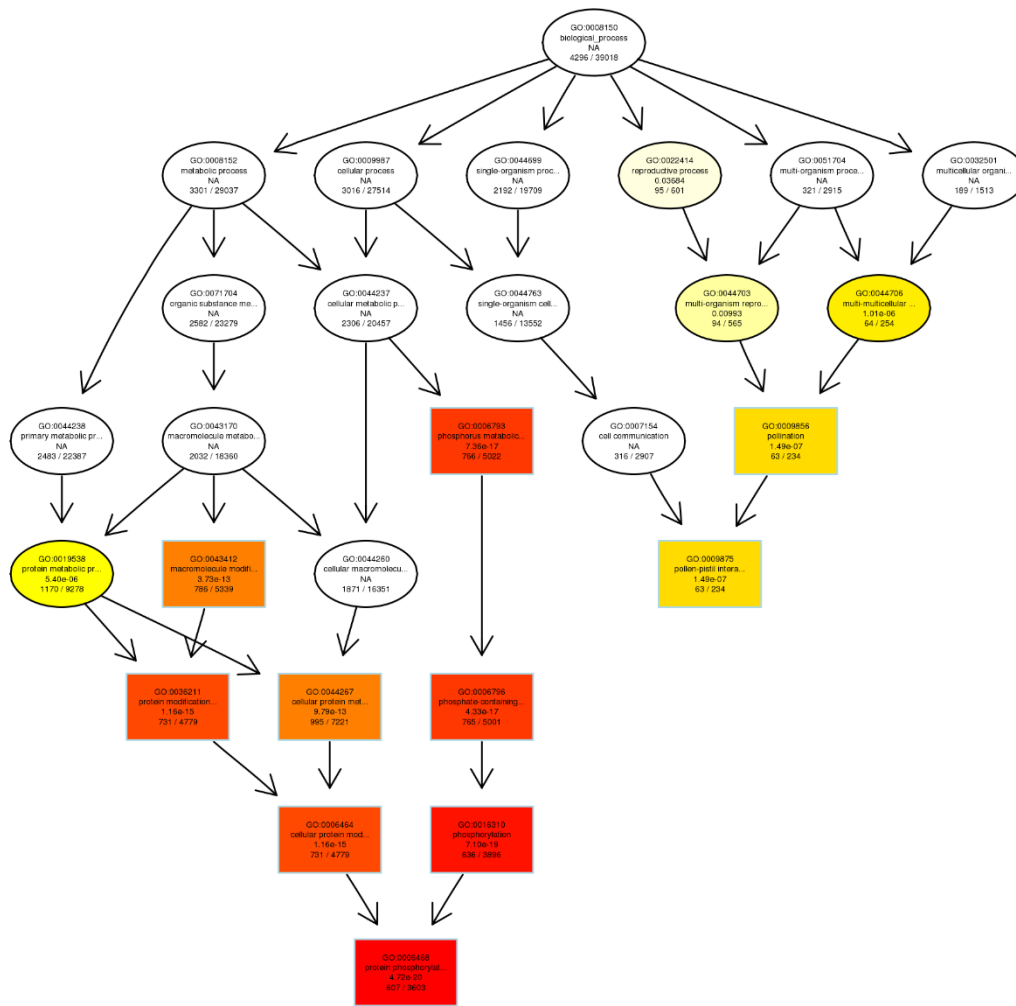

**Figure S2.** Enriched gene ontologies in differentially expressed genes of transgenic switchgrass. Each box shows the GO term number, the p-value in parenthesis, and GO term. Box colors indicates levels of statistical significance: yellow = 0.05; orange =  $e-05$ ; and red =  $e-09$ .
